# Supplementary material
Source: PubMed Central journal article supplement (PMC8629941)

Suppl. Fig. 1  
Frontal spectra

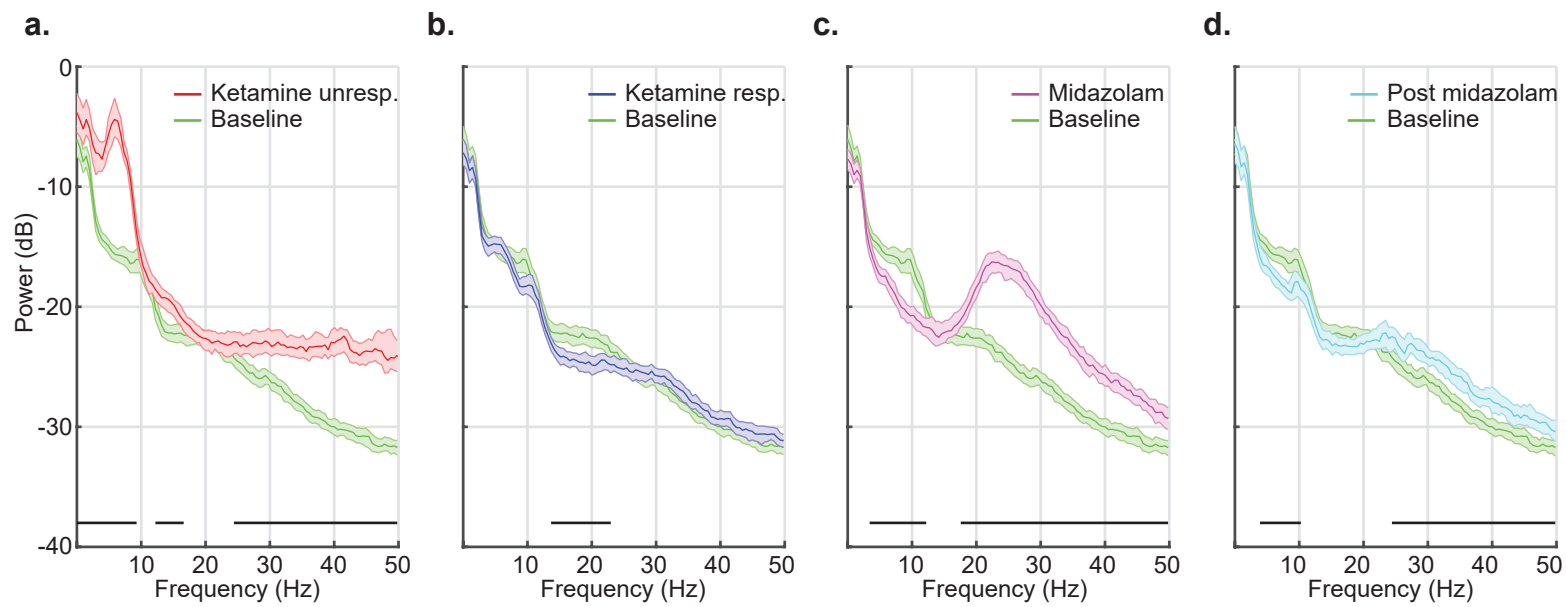

Occipital spectra

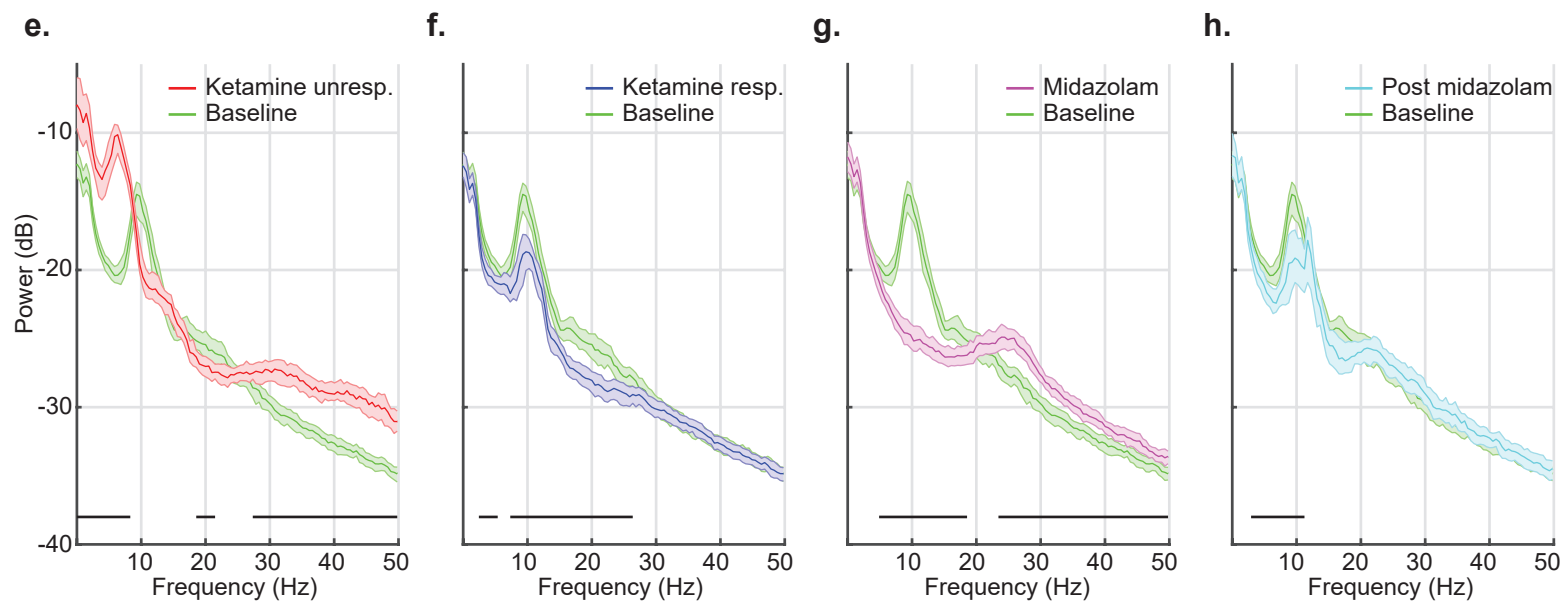

Supplement: NIHMS1747206-supplement-1.pdf [file NIHMS1747206-supplement-1.pdf]

Suppl. Fig.2  
Coherence

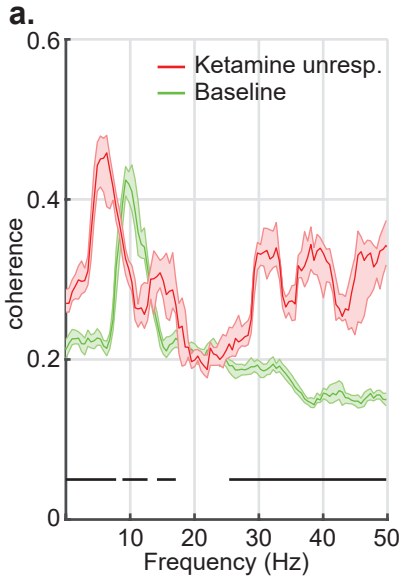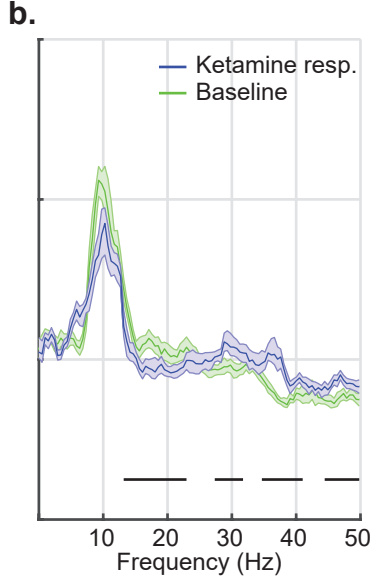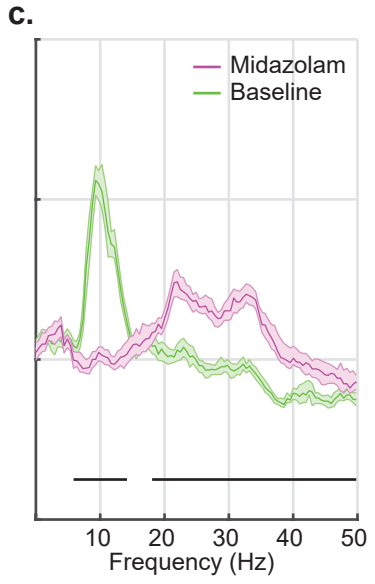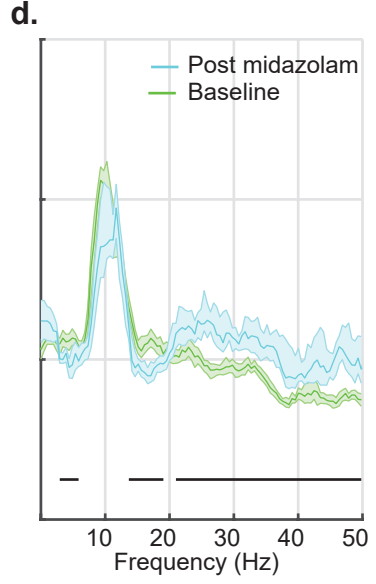

Supplement: NIHMS1747206-supplement-2.pdf [file NIHMS1747206-supplement-2.pdf]
